# Supplementary material for: Exploring the Use of Helicogenic Amino Acids for Optimising Single Chain Relaxin-3 Peptide Agonists
Source: MDPI journal article supplement (doi:10.3390/biomedicines8100415), 2020-10-14
Supplement: s1 [file s1]

**Ac-R3 B10-27 13,17 Aib (1)**

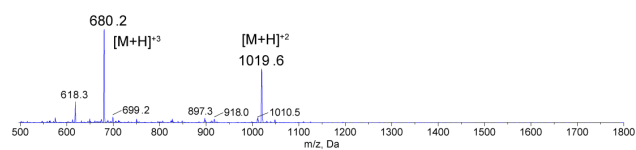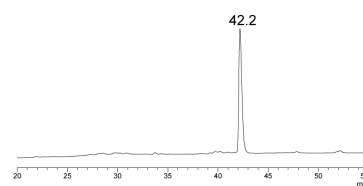

**Ac-R3 B10-27 13,14,17 Aib (2)**

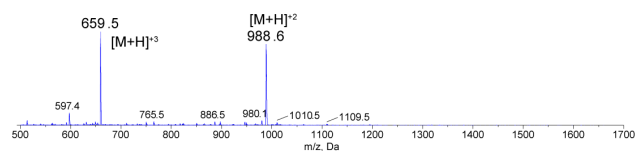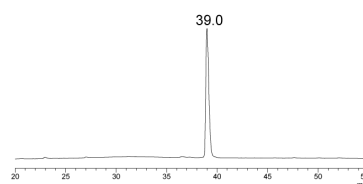

**R3 B10-27 13,17,18 Aib (3)**

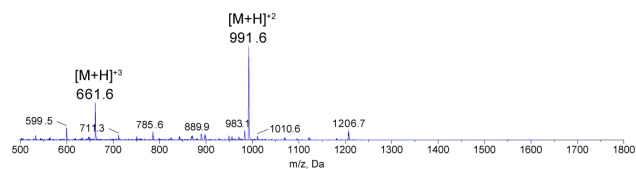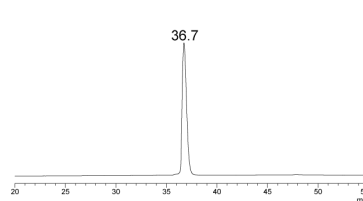

**Ac-R3 B10-27 13,17,18 Aib (4)**

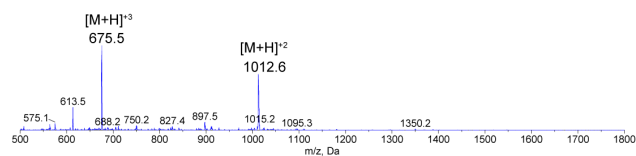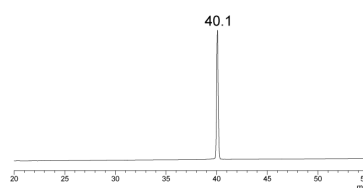

**R3 B10-27 13,17,21 Aib (5)**

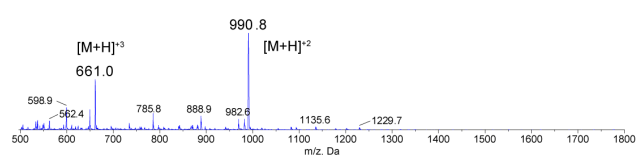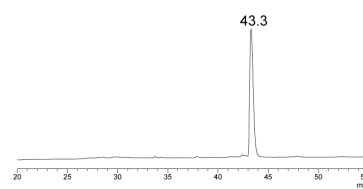

**Ac-R3 B10-27 13,17,21 Aib (6)**

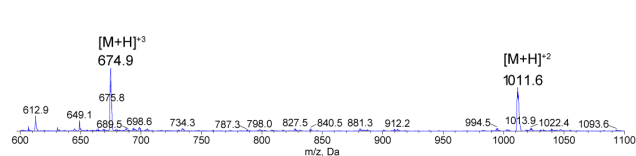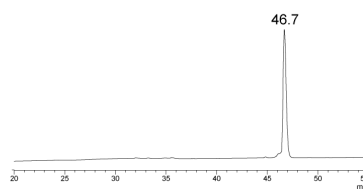

**Figure S1. Mass spectra of analogues 1 – 6 and their corresponding peak retention time in analytical HPLC.**

**R3 B10-27 13,17,22 Aib (7)**

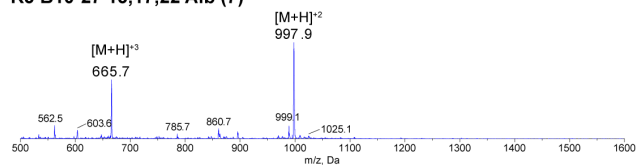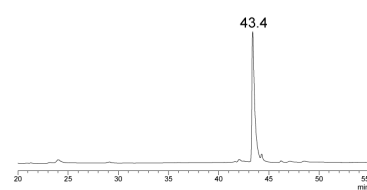

**AC-R3 B10-27 13,17,22 Aib (8)**

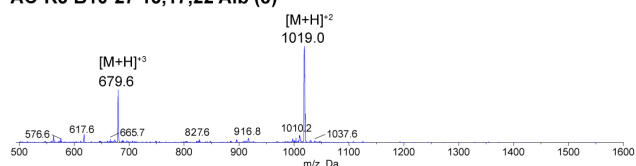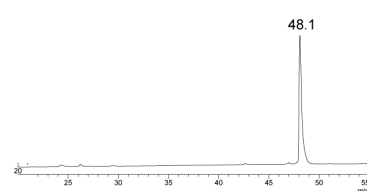

**R3 B10-27 13,17,18,21 Aib (9)**

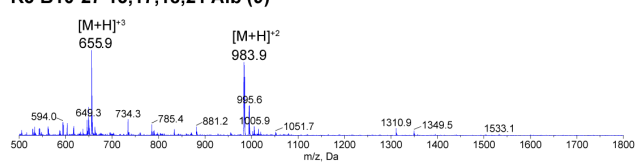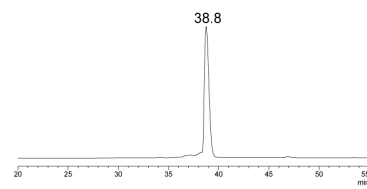

**AC-R3 B10-27 13,17,18,21 Aib (10)**

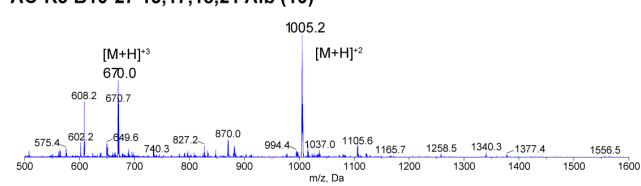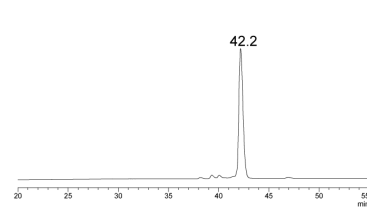

**Ac-R3 B10-27 13,17 Pa<sup>a</sup> (11)**

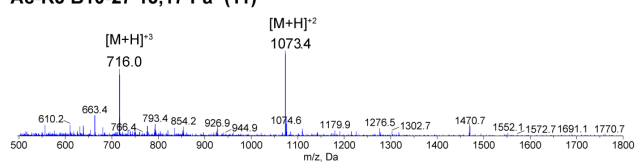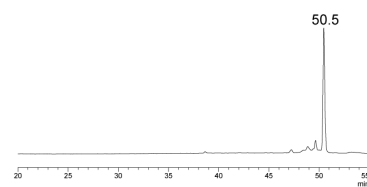

**4K-R3 B10-27 13,17 Pa<sup>b</sup> (12)**

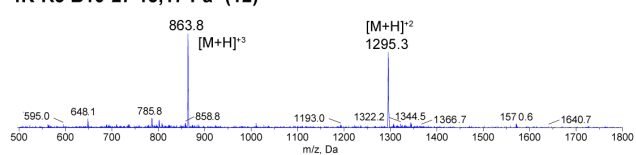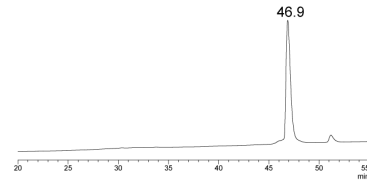

**Figure S2. Mass spectra of analogues 7 – 12 and their corresponding peak retention time in analytical HPLC.**

**Ac-R3 B10-27 13,17 Pg<sup>a</sup> (13)**

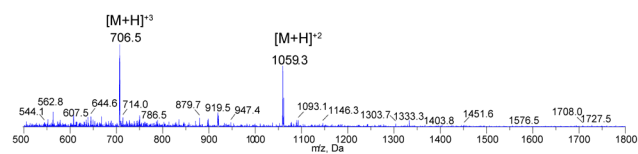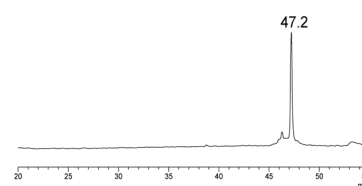

**R3 B10-27 13,17 DCA<sup>b</sup> (14)**

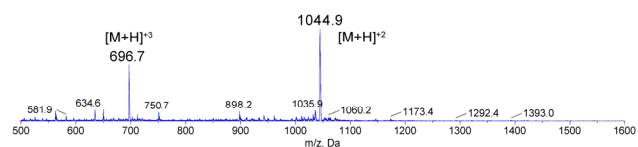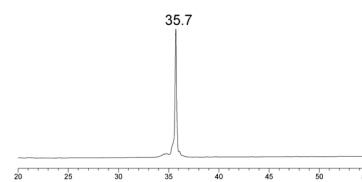

**AC-R3 B10-27 13,17 DCA<sup>b</sup> (15)**

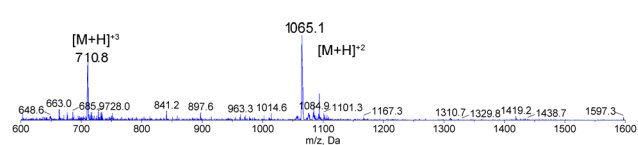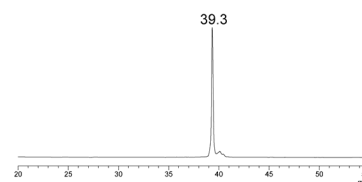

**R3 B10-27 13,17 DBx<sup>b</sup> (16)**

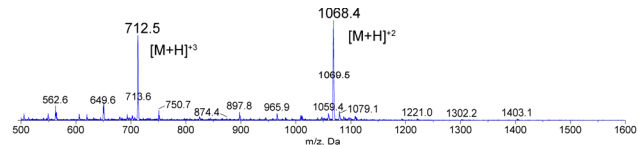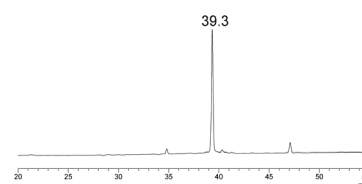

**AC-R3 B10-27 13,17 DBx<sup>b</sup> (17)**

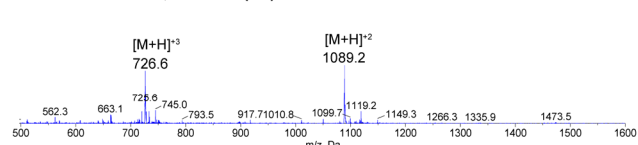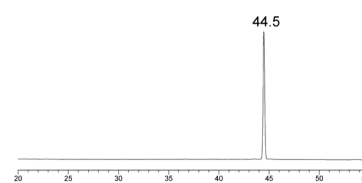

**Figure S3. Mass spectra of analogues 13 – 17 and their corresponding peak retention time in analytical HPLC.**
